# Supplementary material
Source: publisher figshare collection journal article supplement (https://gsajournals.figshare.com/ndownloader/files/17768255)
Supplement: Supplementary file 1 [file 17768255]

**Table S1. Data for Figure 2 and 5.**

Data for skull measurement, nose length, body weight, body length, developmental delay test, homecage activity, freezing, repetitive grooming and NOR test in both sexes of WT, 16GsoT/+ and 16Gso T/T includes mean (+-), standard error (SE), sample size (n), ration of mutant to WT, and p-value. *data includes male and female.
